# Supplementary material
Source: publisher site journal article supplement (https://www.dovepress.com/get_supplementary_file.php?f=468444.docx)
Supplement: Supplementary file 1 [file get_supplementary_file.php]

**Supplementary Table 1.** Characteristics of genetic variants associated with daytime napping used in the Mendelian randomization analysis.

| SNP | Chr | Position | Effect allele | Other allele | EAF | *β* estimate* | SE | *P*-value | F |
| --- | --- | --- | --- | --- | --- | --- | --- | --- | --- |
| rs2786547 | 1 | 33342304 | T | C | 0.18 | -0.011 | 0.002 | 1.00E-11 | 46.0 |
| rs6665690 | 1 | 162836235 | C | A | 0.17 | -0.009 | 0.002 | 6.00E-09 | 32.7 |
| rs12140153 | 1 | 62579891 | T | G | 0.10 | -0.025 | 0.002 | 2.40E-31 | 136.5 |
| rs35039375 | 1 | 171516863 | G | A | 0.09 | 0.014 | 0.002 | 8.70E-11 | 41.8 |
| rs301817 | 1 | 8503379 | A | C | 0.59 | 0.007 | 0.001 | 1.60E-09 | 35.3 |
| rs11383197 | 1 | 34998659 | AG | A | 0.68 | 0.007 | 0.001 | 2.70E-08 | 30.9 |
| rs35549521 | 1 | 46028185 | CT | C | 0.43 | -0.007 | 0.001 | 1.50E-08 | 33.3 |
| rs1931175 | 1 | 96928273 | G | C | 0.38 | 0.008 | 0.001 | 4.60E-10 | 38.7 |
| rs12042846 | 1 | 98667103 | C | T | 0.18 | 0.009 | 0.002 | 1.90E-08 | 32.1 |
| rs200435329 | 1 | 174316633 | T | G | 0.24 | 0.010 | 0.001 | 9.90E-12 | 47.0 |
| rs2250377 | 1 | 201860626 | G | A | 0.66 | -0.013 | 0.001 | 1.40E-24 | 105.7 |
| rs13033444 | 2 | 23611438 | G | A | 0.28 | 0.010 | 0.001 | 3.60E-13 | 52.1 |
| rs75022160 | 2 | 25311861 | T | C | 0.14 | -0.010 | 0.002 | 1.70E-08 | 31.2 |
| rs9287862 | 2 | 151500518 | T | C | 0.91 | -0.012 | 0.002 | 2.00E-08 | 32.4 |
| rs2202323 | 2 | 49408317 | C | G | 0.63 | -0.008 | 0.001 | 1.20E-09 | 36.4 |
| rs7423968 | 2 | 59467016 | G | A | 0.43 | -0.008 | 0.001 | 4.80E-10 | 38.8 |
| rs80163246 | 2 | 164574344 | C | T | 0.12 | 0.012 | 0.002 | 1.40E-10 | 40.0 |
| rs7422655 | 2 | 208941004 | T | C | 0.74 | -0.008 | 0.001 | 1.10E-08 | 32.3 |
| rs908442 | 2 | 236800163 | T | A | 0.41 | -0.010 | 0.001 | 1.40E-16 | 69.2 |
| rs9309116 | 2 | 44557919 | T | C | 0.65 | 0.007 | 0.001 | 3.90E-09 | 33.6 |
| rs62189006 | 2 | 162573586 | G | A | 0.09 | -0.012 | 0.002 | 8.30E-09 | 33.2 |
| rs350785 | 2 | 52934600 | C | T | 0.88 | -0.013 | 0.002 | 1.50E-11 | 43.9 |
| rs11682175 | 2 | 57987593 | C | T | 0.47 | 0.007 | 0.001 | 1.10E-08 | 32.7 |
| rs12992648 | 2 | 206843819 | G | A | 0.28 | -0.008 | 0.001 | 2.40E-08 | 32.3 |
| rs4511908 | 3 | 82770852 | G | T | 0.58 | 0.007 | 0.001 | 1.40E-08 | 32.0 |
| rs1601440 | 3 | 84665393 | T | C | 0.72 | -0.009 | 0.001 | 1.90E-11 | 45.3 |
| rs76824303 | 3 | 62459819 | C | A | 0.10 | -0.012 | 0.002 | 1.70E-08 | 32.2 |
| rs2699869 | 3 | 133032892 | C | A | 0.55 | -0.007 | 0.001 | 3.10E-08 | 31.0 |
| rs150538418 | 3 | 138064170 | GT | G | 0.22 | -0.009 | 0.002 | 7.20E-09 | 34.2 |
| rs77154532 | 3 | 19377311 | G | A | 0.36 | -0.008 | 0.001 | 1.40E-09 | 36.7 |
| rs936944 | 3 | 44385814 | A | G | 0.84 | -0.009 | 0.002 | 3.20E-08 | 30.9 |
| rs1001817 | 3 | 183995341 | T | C | 0.49 | -0.008 | 0.001 | 1.70E-10 | 40.8 |
| rs140008192 | 4 | 152967845 | GTA | G | 0.43 | 0.007 | 0.001 | 4.30E-08 | 29.4 |
| rs7697461 | 4 | 79565819 | T | A | 0.74 | 0.008 | 0.001 | 6.00E-09 | 34.4 |
| rs76536937 | 4 | 170222592 | TA | T | 0.48 | -0.008 | 0.001 | 8.00E-10 | 36.7 |
| rs13150944 | 4 | 85408000 | G | A | 0.69 | 0.009 | 0.001 | 6.80E-11 | 42.3 |
| rs2099810 | 5 | 112030173 | G | A | 0.50 | -0.008 | 0.001 | 2.80E-10 | 40.1 |
| rs467897 | 5 | 102155610 | A | G | 0.68 | -0.010 | 0.001 | 2.60E-13 | 54.0 |
| rs12657723 | 5 | 62760828 | T | C | 0.32 | 0.008 | 0.001 | 2.00E-10 | 39.7 |
| rs13169872 | 5 | 62878799 | A | G | 0.32 | 0.007 | 0.001 | 3.00E-08 | 30.1 |
| rs2943023 | 5 | 89597733 | T | C | 0.42 | -0.007 | 0.001 | 7.40E-09 | 33.3 |
| rs2431108 | 5 | 103947968 | C | T | 0.33 | 0.013 | 0.001 | 7.70E-24 | 101.2 |
| rs6452787 | 5 | 87712831 | G | A | 0.46 | -0.008 | 0.001 | 2.00E-10 | 40.3 |
| rs10875606 | 5 | 143769614 | A | C | 0.68 | -0.007 | 0.001 | 1.30E-08 | 31.8 |
| rs10875622 | 5 | 146693062 | A | G | 0.58 | 0.010 | 0.001 | 1.30E-17 | 72.5 |
| rs73817091 | 5 | 159042652 | T | C | 0.04 | 0.017 | 0.003 | 3.80E-08 | 29.9 |
| rs140506252 | 6 | 155129280 | T | A | 0.02 | -0.023 | 0.004 | 4.30E-08 | 30.9 |
| rs3799380 | 6 | 26467182 | C | T | 0.20 | -0.009 | 0.002 | 1.30E-08 | 34.6 |
| rs61332968 | 6 | 38467487 | GA | G | 0.29 | 0.008 | 0.001 | 4.20E-09 | 34.0 |
| rs2653349 | 6 | 55142337 | G | A | 0.79 | -0.017 | 0.001 | 3.40E-29 | 126.0 |
| rs1546977 | 6 | 84314423 | G | A | 0.44 | 0.008 | 0.001 | 1.00E-11 | 45.8 |
| rs9389556 | 6 | 100079774 | G | C | 0.26 | 0.008 | 0.001 | 9.70E-10 | 37.0 |
| rs785145 | 6 | 114650655 | G | T | 0.43 | 0.007 | 0.001 | 1.00E-08 | 32.5 |
| rs614987 | 6 | 124920871 | C | A | 0.61 | 0.011 | 0.001 | 7.50E-19 | 77.8 |
| rs6919087 | 6 | 37699156 | G | T | 0.31 | -0.011 | 0.001 | 1.00E-16 | 67.6 |
| rs2143792 | 6 | 62182204 | A | G | 0.43 | -0.007 | 0.001 | 9.10E-09 | 33.4 |
| rs34262487 | 6 | 36224315 | A | C | 0.07 | -0.015 | 0.002 | 1.20E-09 | 38.0 |
| rs9460110 | 6 | 170621249 | C | T | 0.37 | 0.007 | 0.001 | 8.40E-09 | 34.2 |
| rs35851551 | 7 | 31330785 | G | A | 0.10 | -0.011 | 0.002 | 3.50E-08 | 30.5 |
| rs10257273 | 7 | 99188589 | T | A | 0.15 | -0.011 | 0.002 | 8.90E-10 | 39.7 |
| rs76257331 | 7 | 106916279 | A | G | 0.20 | 0.009 | 0.002 | 1.20E-08 | 32.5 |
| rs13263535 | 8 | 1175131 | T | G | 0.47 | -0.007 | 0.001 | 1.60E-08 | 31.9 |
| rs285815 | 8 | 106108303 | A | T | 0.54 | -0.008 | 0.001 | 5.80E-10 | 38.1 |
| rs351776 | 8 | 28191306 | C | A | 0.55 | 0.008 | 0.001 | 8.40E-10 | 38.3 |
| rs2059639 | 8 | 67381858 | T | C | 0.52 | -0.007 | 0.001 | 2.40E-08 | 30.1 |
| rs7814873 | 8 | 142213997 | T | C | 0.62 | -0.007 | 0.001 | 1.50E-08 | 32.5 |
| rs17502738 | 9 | 37441650 | C | T | 0.20 | -0.009 | 0.002 | 2.00E-08 | 32.4 |
| rs295278 | 9 | 86420144 | A | G | 0.39 | -0.008 | 0.001 | 2.20E-10 | 40.2 |
| rs971415 | 9 | 108846445 | G | A | 0.12 | -0.011 | 0.002 | 1.20E-09 | 35.7 |
| rs10811438 | 9 | 20962282 | C | G | 0.39 | -0.007 | 0.001 | 3.20E-09 | 33.7 |
| rs13284688 | 9 | 81727018 | C | T | 0.21 | 0.015 | 0.001 | 1.70E-23 | 101.1 |
| rs12346996 | 9 | 131840856 | C | T | 0.73 | -0.008 | 0.001 | 5.00E-09 | 34.0 |
| rs4604518 | 9 | 120555845 | A | G | 0.45 | -0.007 | 0.001 | 1.40E-08 | 32.1 |
| rs11258652 | 10 | 13868855 | A | C | 0.24 | -0.010 | 0.001 | 3.70E-13 | 53.0 |
| rs224111 | 10 | 64552010 | A | G | 0.39 | -0.008 | 0.001 | 1.60E-10 | 40.9 |
| rs10840017 | 11 | 8335754 | G | A | 0.23 | -0.009 | 0.001 | 2.00E-09 | 36.4 |
| rs271057 | 11 | 92769748 | T | C | 0.75 | -0.009 | 0.001 | 6.50E-10 | 38.1 |
| rs11224896 | 11 | 101479583 | C | T | 0.11 | -0.011 | 0.002 | 1.10E-08 | 33.1 |
| rs174541 | 11 | 61565908 | C | T | 0.36 | 0.010 | 0.001 | 4.40E-15 | 61.2 |
| rs10835420 | 11 | 28866669 | A | T | 0.25 | -0.009 | 0.001 | 1.70E-10 | 40.3 |
| rs60222088 | 12 | 108334477 | A | C | 0.15 | -0.011 | 0.002 | 6.40E-11 | 42.5 |
| rs10772659 | 12 | 13504828 | A | T | 0.44 | 0.007 | 0.001 | 2.70E-09 | 35.5 |
| rs35011311 | 12 | 38616581 | T | G | 0.27 | -0.009 | 0.001 | 4.40E-11 | 43.2 |
| rs11615756 | 12 | 117942076 | T | C | 0.40 | 0.018 | 0.001 | 1.40E-49 | 217.4 |
| rs2769916 | 13 | 107820389 | A | G | 0.69 | 0.009 | 0.001 | 1.70E-11 | 44.4 |
| rs10149986 | 14 | 29721044 | G | T | 0.19 | 0.011 | 0.002 | 4.40E-12 | 48.8 |
| rs2370926 | 14 | 79602542 | C | T | 0.37 | -0.008 | 0.001 | 1.70E-10 | 41.4 |
| rs10152428 | 15 | 93510243 | C | G | 0.73 | 0.008 | 0.001 | 1.10E-08 | 32.5 |
| rs11071755 | 15 | 63793936 | A | G | 0.43 | -0.007 | 0.001 | 5.20E-09 | 33.6 |
| rs17158413 | 15 | 83235408 | A | G | 0.24 | 0.009 | 0.001 | 4.40E-11 | 41.9 |
| rs9939355 | 16 | 23837048 | T | C | 0.56 | -0.007 | 0.001 | 4.50E-09 | 35.2 |
| rs378421 | 16 | 28754684 | A | G | 0.42 | 0.007 | 0.001 | 2.40E-08 | 31.8 |
| rs11860072 | 16 | 56193408 | T | C | 0.45 | -0.009 | 0.001 | 2.80E-13 | 52.5 |
| rs13330072 | 16 | 69402831 | G | A | 0.29 | 0.008 | 0.001 | 4.80E-09 | 34.8 |
| rs60920123 | 16 | 10134637 | A | G | 0.43 | -0.008 | 0.001 | 4.50E-10 | 38.7 |
| rs3935190 | 17 | 79084367 | A | G | 0.54 | 0.008 | 0.001 | 5.40E-11 | 42.9 |
| rs385199 | 17 | 43686419 | C | A | 0.23 | -0.021 | 0.001 | 7.50E-47 | 208.1 |
| rs112520848 | 17 | 64308310 | C | G | 0.39 | 0.007 | 0.001 | 1.80E-08 | 31.5 |
| rs12451365 | 17 | 35595368 | C | T | 0.20 | 0.011 | 0.002 | 1.50E-12 | 49.9 |
| rs962247 | 18 | 23084118 | A | G | 0.48 | -0.008 | 0.001 | 5.70E-11 | 42.3 |
| rs2033103 | 18 | 36097882 | T | C | 0.45 | 0.007 | 0.001 | 2.60E-09 | 35.4 |
| rs9965170 | 18 | 44788274 | A | G | 0.42 | -0.014 | 0.001 | 7.80E-29 | 123.2 |
| rs17265513 | 20 | 39832628 | C | T | 0.20 | 0.009 | 0.002 | 2.00E-09 | 36.1 |
| rs910187 | 20 | 45841052 | A | G | 0.37 | -0.007 | 0.001 | 4.90E-09 | 33.9 |
| rs3810484 | 20 | 62194103 | G | A | 0.44 | -0.007 | 0.001 | 2.20E-08 | 31.3 |
| rs1883048 | 21 | 47397586 | C | T | 0.52 | 0.008 | 0.001 | 1.80E-10 | 41.4 |
| rs2284015 | 22 | 37096573 | G | C | 0.26 | 0.008 | 0.001 | 4.10E-08 | 30.9 |

* The *β* estimates are defined for each additional effect allele. Positive *β* indicates more frequent daytime napping.

**Abbreviations**: Chr, chromosome; EAF, effect allele frequency; SNP, single nucleotide polymorphism; SE, standard error.

**Supplementary Table 2.** Characteristics of the studies included in the meta-analysis of daytime napping and NAFLD incidence events.

| **Author** | **Year** | **Country** | **Study design** | **Sample size** | **Age(years): mean ± SD /mean(range)** | **Male** | **Exposure groups (napping duration)** | **N** | **NAFLD Cases** | **OR (95%CI)** | **Diagnostic method** |
| --- | --- | --- | --- | --- | --- | --- | --- | --- | --- | --- | --- |
| Peng, K. et al.1 | 2016 | China | Observational | 8559 | 58.5±9.0 | 36.3% | 0  <=0.5h  >0.5h | 5883  759  1917 | 1748  230  622 | 1(ref)  1.03(0.88,1.22)  1.14(1.02,1.28) | ultrasonography |
| Hong, C. et al.2 | 2022 | China | Observational | 3363 | NA | 63.6% | 0  <0.5h  0.5-1h  >1h | 400  357  1732  874 | 9  11  79  41 | 1(ref)  1.38 (0.57-3.37)  2.07(1.07-2.90)  2.14(1.05-3.12) | ultrasonography |
| Zarean, E. et al.3 | 2023 | Iran | Observational | 9151 | 49.1±9.2 | 46.4% | 0  >0 | 4149  5002 | 524  796 | 1(ref)  1.29(1.17,1.44) | ultrasonography |
| Yang, J. et al.4 | 2022 | China | Observational | 5011 | 63.6±10.8 | 40.1% | <=0.5h  >0.5h | 2973  2038 | 793  630 | 1(ref)  1.17(1.03,1.33) | ultrasonography |
| Zhao, X. et al.5 | 2020 | China | Observational | 3236 | 52.5±13.2 | 37.5% | 0  <0.5h  0.5-1h  >1h | 1272  882  778  304 | 500  300  306  127 | 1(ref)  0.78(0.65,0.93)  0.96(0.80,1.16)  1.08(0.84,1.40) | ultrasonography |
| Qu, H. et al.6-1 | 2014 | China | Observational | 6438 | 61(51,67) | 32.2% | 0  <0.5h  0.5-1h  >1h | 4949  464  576  449 | 431  45  64  75 | 1(ref)  1.17(0.76,1.78)  1.51(1.03,2.20)  1.96(1.36,2.82) | ultrasonography |
| Qu, H. et al.6-2 | 2014 | China | Observational | 170 | 60.3±7.0 | 38.8% | 0  <0.5h  0.5-1h  >1h | 80  17  42  31 | 9  5  14  15 | 1(ref)  2.32(0.55,9.85)  4.39(1.51,12.76)  8.06(2.63,24.72) | ultrasonography |

**Supplementary Figure 1.** Flowchart of the study selection process. PRISMA figure adapted from Page MJ, McKenzie JE, Bossuyt PM, et al.[7](https://www.dovepress.com/sleep-and-its-disturbance-in-parents-of-children-and-adolescents-with--peer-reviewed-fulltext-article-NSS#cit0024)

**
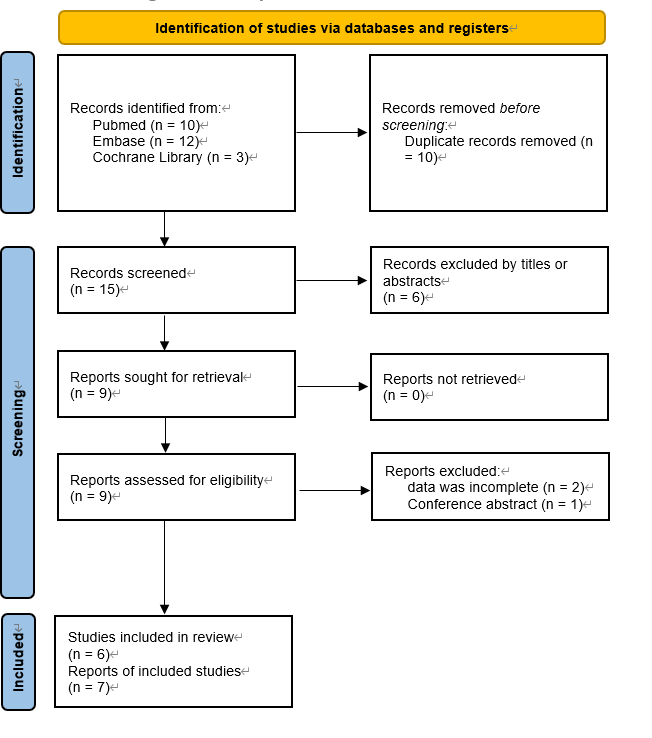
**

**Supplementary Figure 2.** Funnel plot of studies of napping and NAFLD.


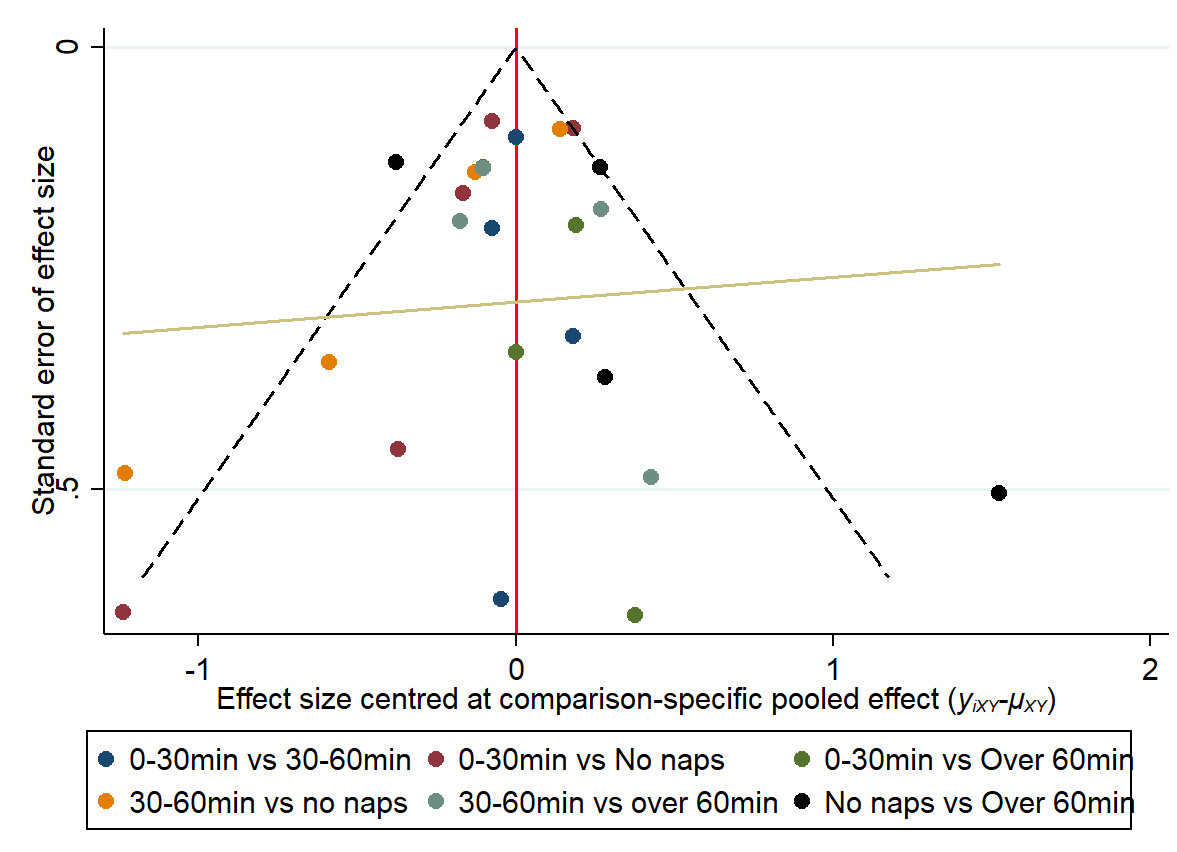


**Supplementary Table 3.** Risk of bias assessment using the Newcastle-Ottawa SCALE.

|  | **Study** | Hong, C. et al.2 | Peng, K. et al.1 | Qu, H. et al.6 | Yang, J. et al.4 | Zarean, E. et al.3 | Zhao, X. et al.5 |
| --- | --- | --- | --- | --- | --- | --- | --- |
| ***Selection*** | Representativeness of the exposed cohort | ★ | ★ | ★ | ★ | ★ | ★ |
| Selection of the non-exposed cohort | ★ | ★ | ★ | ★ | ★ | ★ |
| Ascertainment of exposure |  | ★ | ★ | ★ | ★ | ★ |
| Demonstration that outcome of interest was not present at start of study |  |  | ★ | ★ | ★ | ★ |
| ***Comparability*** | Comparability of cohorts on the basis of the design or analysis | ★★ | ★★ | ★★ | ★★ | ★★ | ★★ |
| ***Outcome*** | Assessment of outcome | ★ | ★ | ★ | ★ | ★ | ★ |
| Was follow-up long enough for outcomes to occur |  |  |  |  |  |  |
| Adequacy of follow up of cohorts | ★ | ★ | ★ | ★ | ★ | ★ |
| ***Quality score*** |  | 6 | 7 | 8 | 8 | 8 | 8 |

The star symbol represents an additional point. Except for comparability, which can be rated up to 2 stars, all other entries can be rated up to 1 star. The full score is 9 stars, and a higher score indicates higher research quality.

**Supplementary Table 4.** Cochran’s Q test, inverse variance weighted and sensitivity analyses of daytime napping and the risks of NAFLD.

| Disease | Cochran's Q test | Inverse variance weighted | | | | Sensitivity analysis | |
| --- | --- | --- | --- | --- | --- | --- | --- |
| *P*-value | SNPs, n | β | SE | *P*-value | SE | *P*-value |
| NAFLD | 0.225 | 105 | 0.817 | 0.255 | 0.001 | 0.008 | 0.589 |

The Cochran’s Q test is a statistical test for heterogeneity.

The intercept term from inverse variance weighted method is a statistical test of horizontal pleiotropy.

Sensitivity analysis were performed after removing the SNPs that were significantly associated with potential confounders under the inverse-variance weighted model.

**Abbreviations:** NAFLD, non-alcoholic fatty liver disease.

**Supplementary Figure 3.** Leave-one-out sensitivity and two-sample MR analyses based on the inverse-variance weighted (IVW) model for determining the effects of daytime napping on NAFLD.


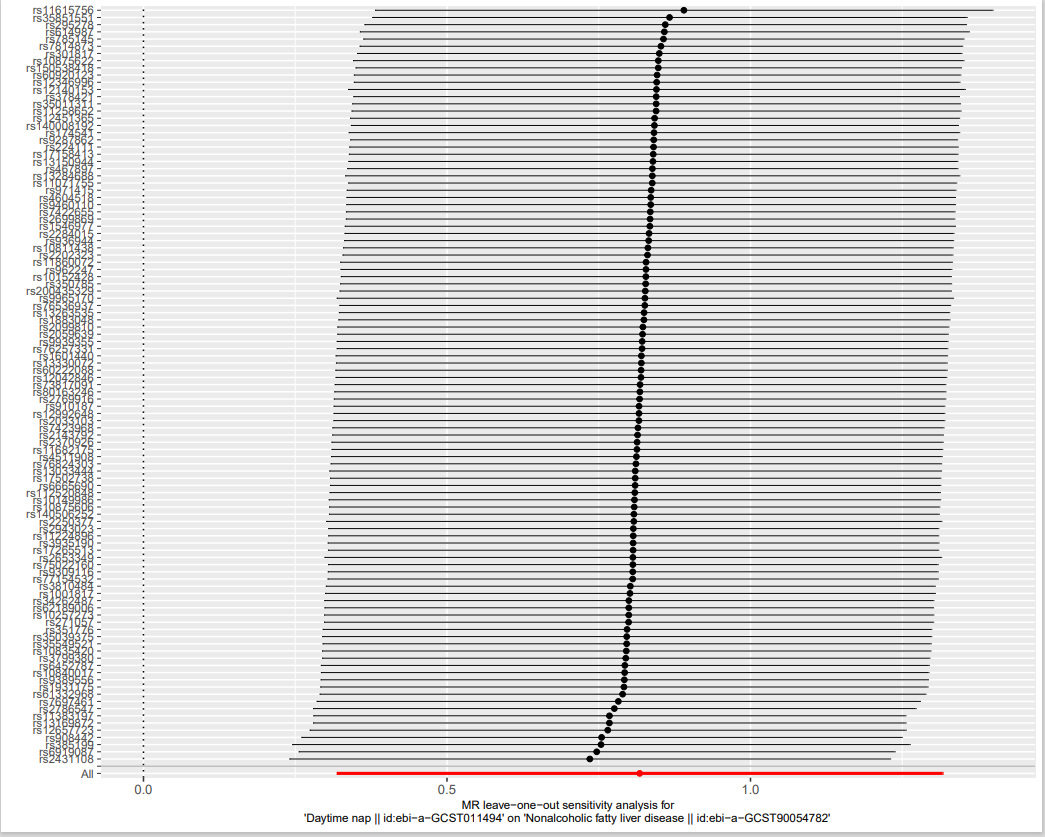


**Supplementary Figure 4.** Leave-one-out sensitivity and two-sample MR analyses based on the inverse-variance weighted (IVW) model for determining the effects of daytime napping on NAFLD.


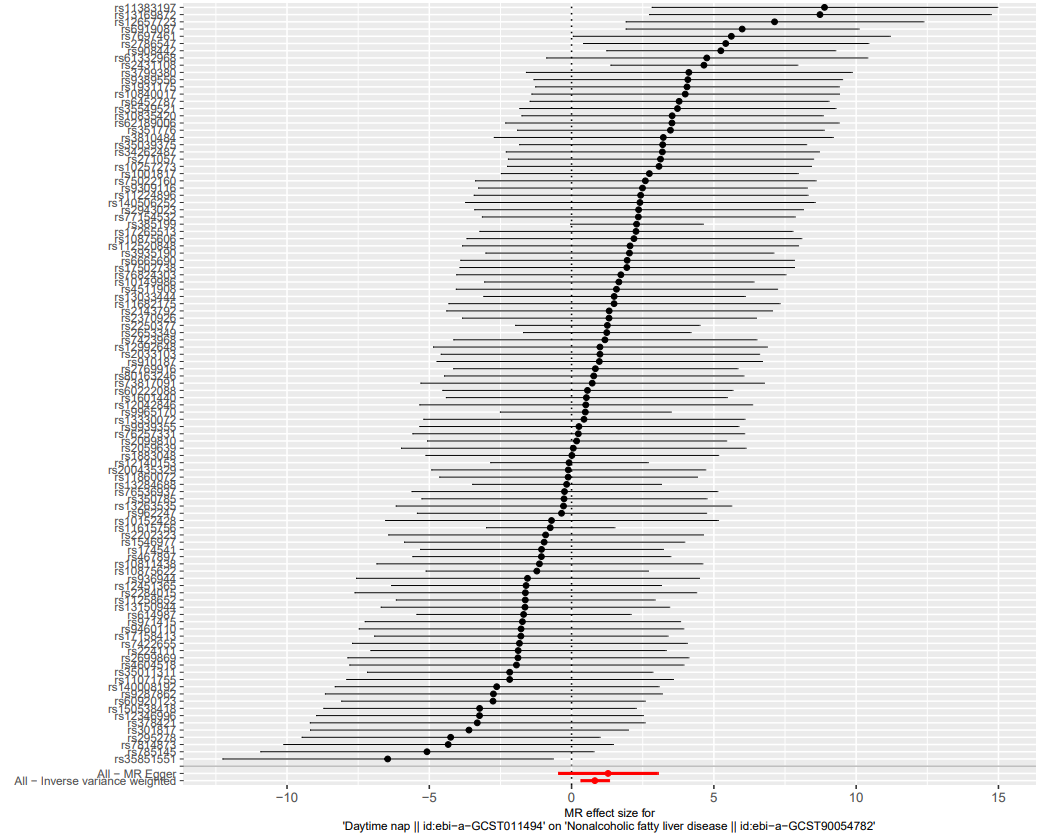


**References**

1. Peng K, Lin L, Wang Z, et al. Short sleep duration and longer daytime napping are associated with non-alcoholic fatty liver disease in Chinese adults. J Diabetes. 2017;9(9):827-836. doi: 10.1111/1753-0407.12489.

2. Hong C, Wu C, Ma P, et al. Positive association of nap duration with risk of non-alcoholic fatty liver disease in an occupational population in Guangdong Province, China: a cross-sectional study. BMC Gastroenterol. 2022;22(1):185. doi: 10.1186/s12876-022-02246-5.

3. Zarean E, Looha MA, Amini P, et al. Sleep characteristics of middle-aged adults with non-alcoholic fatty liver disease: findings from the Shahrekord PERSIAN cohort study. BMC Public Health. 2023;23(1):312. doi: 10.1186/s12889-023-15251-4.

4. Yang J, Luo S, Li R, et al. Sleep Factors in Relation to Metabolic Dysfunction-Associated Fatty Liver Disease in Middle-Aged and Elderly Chinese. J Clin Endocrinol Metab. 2022;107(10):2874-2882. doi: 10.1210/clinem/dgac428.

5. Zhao X, Cheng L, Zhu C, et al. A double-edged sword: the association of daytime napping duration and metabolism related diseases in a Chinese population. Eur J Clin Nutr. 2021;75(2):291-298. doi: 10.1038/s41430-020-00777-2.

6. Qu H, Wang H, Deng M, et al. Associations between longer habitual day napping and non-alcoholic fatty liver disease in an elderly Chinese population. PLos ONE. 2014;9(8):e105583. doi: 10.1371/journal.pone.0105583.

7. Page MJ, McKenzie JE, Bossuyt PM, et al. The PRISMA 2020 statement: an updated guideline for reporting systematic reviews. BMJ. 2021;372:n71. doi: 10.1136/bmj.n71.
